# Supplementary material for: Dimethylthiourea Alleviates Drought Stress by Suppressing Hydrogen Peroxide-Dependent Abscisic Acid-Mediated Oxidative Responses in an Antagonistic Interaction with Salicylic Acid in Brassica napus Leaves
Source: MDPI journal article supplement (doi:10.3390/antiox11112283), 2022-11-18
Supplement: s1 [file s1]

**Supplementary Table S1.** Specific primers used for RT-qPCR.

| <b>Target gene</b> | <b>GenBank Number</b> | <b>Forward sequence (5'-3')</b> | <b>Reverse sequence (5'-3')</b> |
|--------------------|-----------------------|---------------------------------|---------------------------------|
| BnNADPH oxidase    | XM013788801           | TGAGACGAGGGAATTCAGGAAC          | GCTTCTCGTGGGAAGATCCG            |
| BnCu/Zn-SOD        | AY970822              | TGCTAATCGTCATGCTGGAG            | CTCCCTTTCCAAGGTCATCA            |
| BnCAT3             | NM001316190.1         | GATCCTGCGGATGAGGATAA            | AAGCAGCTTGTCATCCGAGT            |
| BnOXI1             | XM013843315           | GCCACCAACTACCACAGGAT            | CCCAAGCAATGACAAAACCT            |
| BnMAPK6            | XM_013884849.2        | GCTAGCTCCATGGGACAGAG            | GAGCAGTTGGTGGTGGATTT            |
| BnNCED3            | XM_013880797          | GGAGTGCTTCTGCTTCCATC            | TTCGAGGTTGACTTGCTCCT            |
| BnMYC2             | XM013880351           | ACCAAACGTCTCGAAAATGG            | TGTCAACGAGCAAGAGGATG            |
| BnICS1             | XM013887885           | TCAATCCCAGAACGAGATCC            | GACAGAAACCTTCGGATGGA            |
| BnNPR1             | EF613226.1            | TGAGAACATTGCCAAGCAAG            | CAACAGCAAAATGGAGAGCA            |
| BnGRXC9            | XM013796108           | GAGAACGCGGTTATGGTGAT            | TGGCGCCAATCTTCTCTAGT            |
| BnTRXh5            | XM013811982           | GAAGTCTGGAGCGAGAAGAT            | CGATCTTGAAGAAGACAACG            |
| BnGPX7             | XM009139799           | GGATATCAAGCGGTTTCGTGT           | GTCGTGGGAGGGTATCTCTG            |
| BnGR1              | AF255651              | CTGATTGGTGGGTTTTGCTT            | ACCTTGGCACCATTGTTAGC            |
| BnActin7           | XM013867490           | GATTCCGTTGCCCTGAAGTA            | GCGACCACCTTGATCTTCAT            |
